# Supplementary material
Source: publisher site journal article supplement (https://www.spandidos-publications.com/6050/downloadSupplementary)
Supplement: Supplementary file 1 [file downloadSupplementary]

## Sheet: genemania-network
Table SIV. The interaction between VHL ad KDR gene and their related genes retrieved from GeneMania database
	Entity 1	Entity 2	Weight	Network group	Network
1	Gene 1	Gene 2	Weight	Network group	Network
2	CDH5	KDR	0.0115483	Co-expression	Wang-Maris-2006
3	CDH5	VEGFC	0.0103914	Co-expression	Wang-Maris-2006
4	CDH5	VEGFA	0.00867998	Co-expression	Wang-Maris-2006
5	VEGFA	VEGFC	0.0179994	Co-expression	Mallon-McKay-2013
6	CDH5	NRP1	0.016348	Co-expression	Mallon-McKay-2013
7	VEGFC	KDR	0.0139022	Co-expression	Roth-Zlotnik-2006
8	ELOC	CUL2	0.0163107	Co-expression	Roth-Zlotnik-2006
9	JADE1	KDR	0.0168665	Co-expression	Roth-Zlotnik-2006
10	CDH5	KDR	0.00907178	Co-expression	Roth-Zlotnik-2006
11	CDH5	VEGFC	0.00688396	Co-expression	Roth-Zlotnik-2006
12	CDH5	EPAS1	0.0103396	Co-expression	Roth-Zlotnik-2006
13	CDH5	NRP1	0.0114929	Co-expression	Roth-Zlotnik-2006
14	VEGFC	KDR	0.00271169	Co-expression	Ramaswamy-Golub-2001
15	EPAS1	CUL2	0.0140045	Co-expression	Ramaswamy-Golub-2001
16	CUL2	VHL	0.00548777	Co-expression	Innocenti-Brown-2011
17	HIF1A	EPAS1	0.00860167	Co-expression	Innocenti-Brown-2011
18	NRP1	HIF1A	0.00974309	Co-expression	Innocenti-Brown-2011
19	EGLN2	CUL2	0.00335212	Co-expression	Innocenti-Brown-2011
20	EGLN3	GREM1	0.00894763	Co-expression	Innocenti-Brown-2011
21	CDH5	KDR	0.0162479	Co-expression	Innocenti-Brown-2011
22	VEGFC	KDR	0.0113809	Co-expression	Alizadeh-Staudt-2000
23	HIF1A	KDR	0.00995344	Co-expression	Alizadeh-Staudt-2000
24	CDH5	KDR	0.0123908	Co-expression	Dobbin-Giordano-2005
25	ELOB	ELOC	0.00269289	Co-expression	Rieger-Chu-2004
26	PDCD6	ELOC	0.00329828	Co-expression	Rieger-Chu-2004
27	EPAS1	KDR	0.0271276	Co-expression	Bild-Nevins-2006 B
28	GREM1	EPAS1	0.0281504	Co-expression	Bild-Nevins-2006 B
29	HIF1A	VEGFA	0.0130405	Co-expression	Bild-Nevins-2006 B
30	NRP1	EPAS1	0.0122009	Co-expression	Bild-Nevins-2006 B
31	CDH5	KDR	0.0199192	Co-expression	Bild-Nevins-2006 B
32	PDCD6	ELOC	0.0143623	Co-expression	Burington-Shaughnessy-2008
33	PDCD6	ELOB	0.0244449	Co-expression	Boldrick-Relman-2002
34	VEGFC	KDR	0.00569547	Co-expression	Arijs-Rutgeerts-2009
35	NRP1	KDR	0.0139207	Co-expression	Arijs-Rutgeerts-2009
36	RBX1	ELOC	0.00580166	Co-expression	Arijs-Rutgeerts-2009
37	CDH5	KDR	0.00418947	Co-expression	Arijs-Rutgeerts-2009
38	CDH5	VEGFC	0.003519	Co-expression	Arijs-Rutgeerts-2009
39	CDH5	EPAS1	0.00786312	Co-expression	Arijs-Rutgeerts-2009
40	CDH5	NRP1	0.00908893	Co-expression	Arijs-Rutgeerts-2009
41	HIF1A	EPAS1	0.0104519	Co-expression	Jiang-de Kok-2017
42	EGLN3	EGLN1	0.0174888	Co-expression	Jiang-de Kok-2017
43	SH2D2A	PAX1	0.0145746	Co-expression	Jiang-de Kok-2017
44	RBX1	ELOC	0.00871452	Co-expression	Perou-Botstein-2000
45	CDH5	KDR	0.0112418	Co-expression	Perou-Botstein-2000
46	JADE1	VEGFA	0.0105979	Co-expression	Wang-Cheung-2015
47	CDH5	EGLN3	0.0137712	Co-expression	Wang-Cheung-2015
48	VEGFC	KDR	0.00980201	Co-expression	Rosenwald-Staudt-2001
	RBX1	ELOC	0.0145491	Co-expression	Ross-Perou-2001
1	NRP1	CUL2	0.0125481	Co-expression	Perou-Botstein-1999
2	PDCD6	CUL2	0.00971048	Co-expression	Perou-Botstein-1999
3	CDH5	KDR	0.0125558	Co-localization	Schadt-Shoemaker-2004
4	CDH5	EPAS1	0.0080365	Co-localization	Schadt-Shoemaker-2004
5	VEGFA	VEGFC	0.0129512	Co-localization	Johnson-Shoemaker-2003
6	EPAS1	KDR	0.00782668	Co-localization	Johnson-Shoemaker-2003
7	PAX1	GREM1	0.00691351	Co-localization	Johnson-Shoemaker-2003
8	NRP1	VEGFC	0.0110907	Co-localization	Johnson-Shoemaker-2003
9	CDH5	KDR	0.00899068	Co-localization	Johnson-Shoemaker-2003
10	CDH5	EPAS1	0.0102064	Co-localization	Johnson-Shoemaker-2003
11	CDH5	NRP1	0.00886807	Co-localization	Johnson-Shoemaker-2003
12	VEGFA	VHL	0.106366	Genetic Interactions	Shen-Mali-2017
13	VEGFD	KDR	0.00210309	Genetic Interactions	Lin-Smith-2010
14	CUL2	VEGFC	0.00110293	Genetic Interactions	Lin-Smith-2010
15	EPAS1	VEGFA	0.000455645	Genetic Interactions	Lin-Smith-2010
16	GREM1	KDR	0.000486044	Genetic Interactions	Lin-Smith-2010
17	JADE1	KDR	0.000581802	Genetic Interactions	Lin-Smith-2010
18	JADE1	VEGFA	0.000441663	Genetic Interactions	Lin-Smith-2010
19	NRP1	VEGFA	0.000394893	Genetic Interactions	Lin-Smith-2010
20	EGLN1	VEGFA	0.000657933	Genetic Interactions	Lin-Smith-2010
21	EGLN3	KDR	0.000469871	Genetic Interactions	Lin-Smith-2010
22	EGLN3	VEGFD	0.00173337	Genetic Interactions	Lin-Smith-2010
	EGLN3	VEGFC	0.000373884	Genetic Interactions	Lin-Smith-2010
1	EGLN3	CUL2	0.00114242	Genetic Interactions	Lin-Smith-2010
2	EGLN3	EPAS1	0.000494704	Genetic Interactions	Lin-Smith-2010
3	EGLN3	ELOB	0.0010898	Genetic Interactions	Lin-Smith-2010
4	EGLN3	EGLN1	0.000714333	Genetic Interactions	Lin-Smith-2010
5	SH2D2A	KDR	0.00113454	Genetic Interactions	Lin-Smith-2010
6	SH2D2A	VEGFA	0.000861261	Genetic Interactions	Lin-Smith-2010
7	CDH5	KDR	0.00100642	Genetic Interactions	Lin-Smith-2010
8	VEGFD	KDR	0.0282757	Pathway	Wu-Stein-2010
9	VEGFC	KDR	0.0359341	Pathway	Wu-Stein-2010
10	CUL2	VHL	0.313792	Pathway	Wu-Stein-2010
11	VEGFA	KDR	0.010687	Pathway	Wu-Stein-2010
12	EPAS1	KDR	0.0263337	Pathway	Wu-Stein-2010
13	EPAS1	VEGFD	0.0645862	Pathway	Wu-Stein-2010
14	EPAS1	VEGFC	0.0820791	Pathway	Wu-Stein-2010
15	EPAS1	VEGFA	0.0244108	Pathway	Wu-Stein-2010
16	ELOC	VHL	0.0427153	Pathway	Wu-Stein-2010
17	ELOC	CUL2	0.0787534	Pathway	Wu-Stein-2010
18	PAX1	VHL	0.518276	Pathway	Wu-Stein-2010
19	ELOB	VHL	0.0427153	Pathway	Wu-Stein-2010
20	ELOB	CUL2	0.0787534	Pathway	Wu-Stein-2010
21	ELOB	ELOC	0.0107204	Pathway	Wu-Stein-2010
22	HIF1A	VHL	0.0204208	Pathway	Wu-Stein-2010
23	HIF1A	KDR	0.00531481	Pathway	Wu-Stein-2010
24	HIF1A	VEGFD	0.0130351	Pathway	Wu-Stein-2010
25	HIF1A	VEGFC	0.0165656	Pathway	Wu-Stein-2010
26	HIF1A	CUL2	0.0376494	Pathway	Wu-Stein-2010
27	HIF1A	VEGFA	0.00492671	Pathway	Wu-Stein-2010
28	HIF1A	ELOC	0.00512507	Pathway	Wu-Stein-2010
29	HIF1A	ELOB	0.00512507	Pathway	Wu-Stein-2010
30	NRP1	KDR	0.0527868	Pathway	Wu-Stein-2010
31	NRP1	VEGFA	0.0489322	Pathway	Wu-Stein-2010
32	EGLN2	HIF1A	0.0425427	Pathway	Wu-Stein-2010
33	EGLN1	EPAS1	0.202247	Pathway	Wu-Stein-2010
34	EGLN1	HIF1A	0.0408184	Pathway	Wu-Stein-2010
35	EGLN3	EPAS1	0.202247	Pathway	Wu-Stein-2010
36	EGLN3	HIF1A	0.0408184	Pathway	Wu-Stein-2010
37	SH2D2A	KDR	0.146002	Pathway	Wu-Stein-2010
38	SH2D2A	VEGFA	0.135341	Pathway	Wu-Stein-2010
39	RBX1	VHL	0.0500714	Pathway	Wu-Stein-2010
40	RBX1	CUL2	0.0923158	Pathway	Wu-Stein-2010
41	RBX1	ELOC	0.0125666	Pathway	Wu-Stein-2010
42	RBX1	ELOB	0.0125666	Pathway	Wu-Stein-2010
43	RBX1	HIF1A	0.00600767	Pathway	Wu-Stein-2010
44	CDH5	KDR	0.0102381	Pathway	Wu-Stein-2010
45	CDH5	VEGFA	0.00949053	Pathway	Wu-Stein-2010
46	VEGFD	KDR	0.0382402	Pathway	NCI_NATURE
47	VEGFC	KDR	0.0604069	Pathway	NCI_NATURE
48	VEGFC	VEGFD	0.168587	Pathway	NCI_NATURE
49	CUL2	VHL	0.230711	Pathway	NCI_NATURE
50	VEGFA	KDR	0.0211961	Pathway	NCI_NATURE
51	EPAS1	VHL	0.062108	Pathway	NCI_NATURE
52	EPAS1	KDR	0.0160008	Pathway	NCI_NATURE
53	EPAS1	VEGFA	0.0247524	Pathway	NCI_NATURE
54	ELOC	VHL	0.189967	Pathway	NCI_NATURE
55	ELOC	CUL2	0.212302	Pathway	NCI_NATURE
56	ELOC	EPAS1	0.0571522	Pathway	NCI_NATURE
57	ELOB	VHL	0.189967	Pathway	NCI_NATURE
58	ELOB	CUL2	0.212302	Pathway	NCI_NATURE
59	ELOB	EPAS1	0.0571522	Pathway	NCI_NATURE
60	ELOB	ELOC	0.174809	Pathway	NCI_NATURE
61	HIF1A	VHL	0.030401	Pathway	NCI_NATURE
62	HIF1A	CUL2	0.0339754	Pathway	NCI_NATURE
63	HIF1A	VEGFA	0.0121159	Pathway	NCI_NATURE
64	HIF1A	ELOC	0.0279752	Pathway	NCI_NATURE
65	HIF1A	ELOB	0.0279752	Pathway	NCI_NATURE
66	NRP1	KDR	0.158515	Pathway	NCI_NATURE
67	SH2D2A	KDR	0.0900394	Pathway	NCI_NATURE
68	RBX1	VHL	0.230711	Pathway	NCI_NATURE
69	RBX1	CUL2	0.257837	Pathway	NCI_NATURE
70	RBX1	ELOC	0.212302	Pathway	NCI_NATURE
71	RBX1	ELOB	0.212302	Pathway	NCI_NATURE
72	RBX1	HIF1A	0.0339754	Pathway	NCI_NATURE
73	CDH5	KDR	0.0710036	Pathway	NCI_NATURE
74	HIF1A	VHL	0.0920575	Physical Interactions	Perez-Perri-Espinosa-2016
75	HIF1A	CUL2	0.0920575	Physical Interactions	Perez-Perri-Espinosa-2016
76	VEGFD	KDR	0.366427	Physical Interactions	IREF-reactome
77	VEGFC	KDR	0.366427	Physical Interactions	IREF-reactome
78	CUL2	VHL	0.0858248	Physical Interactions	IREF-reactome
79	VEGFA	KDR	0.192756	Physical Interactions	IREF-reactome
80	EPAS1	VHL	0.0585778	Physical Interactions	IREF-reactome
81	EPAS1	CUL2	0.0585778	Physical Interactions	IREF-reactome
82	EPAS1	VEGFA	0.082324	Physical Interactions	IREF-reactome
83	ELOC	VHL	0.018965	Physical Interactions	IREF-reactome
84	ELOC	CUL2	0.018965	Physical Interactions	IREF-reactome
85	ELOC	EPAS1	0.0129441	Physical Interactions	IREF-reactome
86	ELOB	VHL	0.018965	Physical Interactions	IREF-reactome
87	ELOB	CUL2	0.018965	Physical Interactions	IREF-reactome
88	ELOB	EPAS1	0.0129441	Physical Interactions	IREF-reactome
89	ELOB	ELOC	0.00419074	Physical Interactions	IREF-reactome
90	HIF1A	VHL	0.0550165	Physical Interactions	IREF-reactome
	HIF1A	CUL2	0.0550165	Physical Interactions	IREF-reactome
1	HIF1A	VEGFA	0.0773191	Physical Interactions	IREF-reactome
2	HIF1A	EPAS1	0.0375503	Physical Interactions	IREF-reactome
3	HIF1A	ELOC	0.0121572	Physical Interactions	IREF-reactome
4	HIF1A	ELOB	0.0121572	Physical Interactions	IREF-reactome
5	NRP1	KDR	0.0754468	Physical Interactions	IREF-reactome
6	EGLN2	VHL	0.149232	Physical Interactions	IREF-reactome
7	EGLN2	CUL2	0.149232	Physical Interactions	IREF-reactome
8	EGLN2	EPAS1	0.101855	Physical Interactions	IREF-reactome
9	EGLN2	ELOC	0.0329763	Physical Interactions	IREF-reactome
10	EGLN2	ELOB	0.0329763	Physical Interactions	IREF-reactome
11	EGLN2	HIF1A	0.0956627	Physical Interactions	IREF-reactome
12	EGLN1	VHL	0.149232	Physical Interactions	IREF-reactome
13	EGLN1	CUL2	0.149232	Physical Interactions	IREF-reactome
14	EGLN1	EPAS1	0.101855	Physical Interactions	IREF-reactome
15	EGLN1	ELOC	0.0329763	Physical Interactions	IREF-reactome
16	EGLN1	ELOB	0.0329763	Physical Interactions	IREF-reactome
17	EGLN1	HIF1A	0.0956627	Physical Interactions	IREF-reactome
18	EGLN3	VHL	0.149232	Physical Interactions	IREF-reactome
19	EGLN3	CUL2	0.149232	Physical Interactions	IREF-reactome
	EGLN3	EPAS1	0.101855	Physical Interactions	IREF-reactome
	EGLN3	ELOC	0.0329763	Physical Interactions	IREF-reactome
	EGLN3	ELOB	0.0329763	Physical Interactions	IREF-reactome
	EGLN3	HIF1A	0.0956627	Physical Interactions	IREF-reactome
	RBX1	VHL	0.0159986	Physical Interactions	IREF-reactome
	RBX1	CUL2	0.0159986	Physical Interactions	IREF-reactome
	RBX1	EPAS1	0.0109195	Physical Interactions	IREF-reactome
	RBX1	ELOC	0.00353526	Physical Interactions	IREF-reactome
	RBX1	ELOB	0.00353526	Physical Interactions	IREF-reactome
	RBX1	HIF1A	0.0102556	Physical Interactions	IREF-reactome
	RBX1	EGLN2	0.0278184	Physical Interactions	IREF-reactome
	RBX1	EGLN1	0.0278184	Physical Interactions	IREF-reactome
	RBX1	EGLN3	0.0278184	Physical Interactions	IREF-reactome
	VEGFD	KDR	0.366427	Physical Interactions	Vastrik-Stein-2007
	VEGFC	KDR	0.366427	Physical Interactions	Vastrik-Stein-2007
	CUL2	VHL	0.0858248	Physical Interactions	Vastrik-Stein-2007
	VEGFA	KDR	0.192756	Physical Interactions	Vastrik-Stein-2007
	EPAS1	VHL	0.0585778	Physical Interactions	Vastrik-Stein-2007
	EPAS1	CUL2	0.0585778	Physical Interactions	Vastrik-Stein-2007
	EPAS1	VEGFA	0.082324	Physical Interactions	Vastrik-Stein-2007
	ELOC	VHL	0.018965	Physical Interactions	Vastrik-Stein-2007
	ELOC	CUL2	0.018965	Physical Interactions	Vastrik-Stein-2007
	ELOC	EPAS1	0.0129441	Physical Interactions	Vastrik-Stein-2007
	ELOB	VHL	0.018965	Physical Interactions	Vastrik-Stein-2007
	ELOB	CUL2	0.018965	Physical Interactions	Vastrik-Stein-2007
	ELOB	EPAS1	0.0129441	Physical Interactions	Vastrik-Stein-2007
	ELOB	ELOC	0.00419074	Physical Interactions	Vastrik-Stein-2007
	HIF1A	VHL	0.0550165	Physical Interactions	Vastrik-Stein-2007
	HIF1A	CUL2	0.0550165	Physical Interactions	Vastrik-Stein-2007
	HIF1A	VEGFA	0.0773191	Physical Interactions	Vastrik-Stein-2007
	HIF1A	EPAS1	0.0375503	Physical Interactions	Vastrik-Stein-2007
	HIF1A	ELOC	0.0121572	Physical Interactions	Vastrik-Stein-2007
	HIF1A	ELOB	0.0121572	Physical Interactions	Vastrik-Stein-2007
	NRP1	KDR	0.0754468	Physical Interactions	Vastrik-Stein-2007
	EGLN2	VHL	0.149232	Physical Interactions	Vastrik-Stein-2007
	EGLN2	CUL2	0.149232	Physical Interactions	Vastrik-Stein-2007
	EGLN2	EPAS1	0.101855	Physical Interactions	Vastrik-Stein-2007
	EGLN2	ELOC	0.0329763	Physical Interactions	Vastrik-Stein-2007
	EGLN2	ELOB	0.0329763	Physical Interactions	Vastrik-Stein-2007
	EGLN2	HIF1A	0.0956627	Physical Interactions	Vastrik-Stein-2007
	EGLN1	VHL	0.149232	Physical Interactions	Vastrik-Stein-2007
	EGLN1	CUL2	0.149232	Physical Interactions	Vastrik-Stein-2007
	EGLN1	EPAS1	0.101855	Physical Interactions	Vastrik-Stein-2007
	EGLN1	ELOC	0.0329763	Physical Interactions	Vastrik-Stein-2007
	EGLN1	ELOB	0.0329763	Physical Interactions	Vastrik-Stein-2007
	EGLN1	HIF1A	0.0956627	Physical Interactions	Vastrik-Stein-2007
	EGLN3	VHL	0.149232	Physical Interactions	Vastrik-Stein-2007
	EGLN3	CUL2	0.149232	Physical Interactions	Vastrik-Stein-2007
	EGLN3	EPAS1	0.101855	Physical Interactions	Vastrik-Stein-2007
	EGLN3	ELOC	0.0329763	Physical Interactions	Vastrik-Stein-2007
	EGLN3	ELOB	0.0329763	Physical Interactions	Vastrik-Stein-2007
	EGLN3	HIF1A	0.0956627	Physical Interactions	Vastrik-Stein-2007
	RBX1	VHL	0.0159986	Physical Interactions	Vastrik-Stein-2007
	RBX1	CUL2	0.0159986	Physical Interactions	Vastrik-Stein-2007
	RBX1	EPAS1	0.0109195	Physical Interactions	Vastrik-Stein-2007
	RBX1	ELOC	0.00353526	Physical Interactions	Vastrik-Stein-2007
	RBX1	ELOB	0.00353526	Physical Interactions	Vastrik-Stein-2007
	RBX1	HIF1A	0.0102556	Physical Interactions	Vastrik-Stein-2007
	RBX1	EGLN2	0.0278184	Physical Interactions	Vastrik-Stein-2007
	RBX1	EGLN1	0.0278184	Physical Interactions	Vastrik-Stein-2007
	RBX1	EGLN3	0.0278184	Physical Interactions	Vastrik-Stein-2007
	ELOB	VHL	0.105	Physical Interactions	Hüttenhain-Krogan-2019
	ELOB	CUL2	0.0540332	Physical Interactions	Hüttenhain-Krogan-2019
	ELOB	ELOC	0.0337989	Physical Interactions	Hüttenhain-Krogan-2019
	HIF1A	ELOB	0.105	Physical Interactions	Hüttenhain-Krogan-2019
	RBX1	ELOB	0.039477	Physical Interactions	Hüttenhain-Krogan-2019
	VEGFA	KDR	0.414214	Physical Interactions	IREF-bhf-ucl
	GREM1	KDR	0.765367	Physical Interactions	IREF-bhf-ucl
	ELOB	ELOC	0.458849	Physical Interactions	Kristensen-Foster-2012
	RBX1	CUL2	0.164046	Physical Interactions	Kristensen-Foster-2012
	ELOB	ELOC	0.0890695	Physical Interactions	Hein-Mann-2015
	HIF1A	VHL	0.134238	Physical Interactions	Hein-Mann-2015
	VEGFA	KDR	0.0931979	Physical Interactions	IREF-quickgo
	EPAS1	VHL	0.114184	Physical Interactions	IREF-quickgo
	HIF1A	VHL	0.0443189	Physical Interactions	IREF-quickgo
	JADE1	VHL	0.428615	Physical Interactions	IREF-quickgo
	NRP1	VEGFA	0.259738	Physical Interactions	IREF-quickgo
	EGLN1	EPAS1	0.310908	Physical Interactions	IREF-quickgo
	EGLN1	HIF1A	0.120674	Physical Interactions	IREF-quickgo
	CDH5	KDR	0.0518972	Physical Interactions	IREF-quickgo
	VEGFD	KDR	0.371347	Physical Interactions	IREF-dip
	VEGFC	KDR	0.371347	Physical Interactions	IREF-dip
	CUL2	VHL	0.158212	Physical Interactions	IREF-dip
	VEGFA	KDR	0.147552	Physical Interactions	IREF-dip
	ELOC	VHL	0.209362	Physical Interactions	IREF-dip
	ELOB	VHL	0.276362	Physical Interactions	IREF-dip
	ELOB	ELOC	0.340052	Physical Interactions	IREF-dip
	HIF1A	VHL	0.0705397	Physical Interactions	IREF-dip
	NRP1	VEGFA	0.121834	Physical Interactions	IREF-dip
	EGLN1	HIF1A	0.330789	Physical Interactions	IREF-dip
	ELOB	ELOC	0.287016	Physical Interactions	Wan-Emili-2015
	ELOB	ELOC	1	Physical Interactions	Havugimana-Emili-2012
	PDCD6	KDR	0.842676	Physical Interactions	IREF-uniprotpp
	VEGFD	KDR	0.0653434	Physical Interactions	BIOGRID-SMALL-SCALE-STUDIES
	VEGFC	KDR	0.126022	Physical Interactions	BIOGRID-SMALL-SCALE-STUDIES
	CUL2	VHL	0.00227875	Physical Interactions	BIOGRID-SMALL-SCALE-STUDIES
	VEGFA	KDR	0.0146739	Physical Interactions	BIOGRID-SMALL-SCALE-STUDIES
	EPAS1	VHL	0.00202462	Physical Interactions	BIOGRID-SMALL-SCALE-STUDIES
	ELOC	VHL	0.00208515	Physical Interactions	BIOGRID-SMALL-SCALE-STUDIES
	ELOC	CUL2	0.00539778	Physical Interactions	BIOGRID-SMALL-SCALE-STUDIES
	ELOB	VHL	0.00231443	Physical Interactions	BIOGRID-SMALL-SCALE-STUDIES
	ELOB	CUL2	0.00599131	Physical Interactions	BIOGRID-SMALL-SCALE-STUDIES
	ELOB	EPAS1	0.00532315	Physical Interactions	BIOGRID-SMALL-SCALE-STUDIES
	ELOB	ELOC	0.00548231	Physical Interactions	BIOGRID-SMALL-SCALE-STUDIES
	HIF1A	VHL	0.00113722	Physical Interactions	BIOGRID-SMALL-SCALE-STUDIES
	HIF1A	VHLL	0.149267	Physical Interactions	BIOGRID-SMALL-SCALE-STUDIES
	HIF1A	CUL2	0.00294388	Physical Interactions	BIOGRID-SMALL-SCALE-STUDIES
	HIF1A	VEGFA	0.00535636	Physical Interactions	BIOGRID-SMALL-SCALE-STUDIES
	HIF1A	EPAS1	0.00261557	Physical Interactions	BIOGRID-SMALL-SCALE-STUDIES
	HIF1A	ELOC	0.00269378	Physical Interactions	BIOGRID-SMALL-SCALE-STUDIES
	HIF1A	ELOB	0.00298998	Physical Interactions	BIOGRID-SMALL-SCALE-STUDIES
	JADE1	VHL	0.00230696	Physical Interactions	BIOGRID-SMALL-SCALE-STUDIES
	NRP1	KDR	0.0181923	Physical Interactions	BIOGRID-SMALL-SCALE-STUDIES
	NRP1	VEGFA	0.0242111	Physical Interactions	BIOGRID-SMALL-SCALE-STUDIES
	EGLN2	EPAS1	0.0138936	Physical Interactions	BIOGRID-SMALL-SCALE-STUDIES
	EGLN2	HIF1A	0.00780396	Physical Interactions	BIOGRID-SMALL-SCALE-STUDIES
	EGLN1	VHL	0.0051709	Physical Interactions	BIOGRID-SMALL-SCALE-STUDIES
	EGLN1	EPAS1	0.011893	Physical Interactions	BIOGRID-SMALL-SCALE-STUDIES
	EGLN1	HIF1A	0.0066802	Physical Interactions	BIOGRID-SMALL-SCALE-STUDIES
	EGLN3	EPAS1	0.013361	Physical Interactions	BIOGRID-SMALL-SCALE-STUDIES
	EGLN3	HIF1A	0.00750479	Physical Interactions	BIOGRID-SMALL-SCALE-STUDIES
	EGLN3	EGLN2	0.0398646	Physical Interactions	BIOGRID-SMALL-SCALE-STUDIES
	EGLN3	EGLN1	0.0341241	Physical Interactions	BIOGRID-SMALL-SCALE-STUDIES
	SH2D2A	KDR	0.0227616	Physical Interactions	BIOGRID-SMALL-SCALE-STUDIES
	RBX1	VHL	0.00146915	Physical Interactions	BIOGRID-SMALL-SCALE-STUDIES
	RBX1	CUL2	0.00380314	Physical Interactions	BIOGRID-SMALL-SCALE-STUDIES
	RBX1	ELOC	0.00348004	Physical Interactions	BIOGRID-SMALL-SCALE-STUDIES
	RBX1	ELOB	0.0038627	Physical Interactions	BIOGRID-SMALL-SCALE-STUDIES
	RBX1	HIF1A	0.00189797	Physical Interactions	BIOGRID-SMALL-SCALE-STUDIES
	CDH5	KDR	0.024955	Physical Interactions	BIOGRID-SMALL-SCALE-STUDIES
	HIF1A	CUL2	0.0994091	Physical Interactions	IREF-innatedb
	EGLN2	HIF1A	0.121226	Physical Interactions	IREF-innatedb
	EGLN1	EPAS1	0.201458	Physical Interactions	IREF-innatedb
	EGLN1	HIF1A	0.074832	Physical Interactions	IREF-innatedb
	EGLN1	EGLN2	0.21562	Physical Interactions	IREF-innatedb
	EGLN3	EPAS1	0.227691	Physical Interactions	IREF-innatedb
	EGLN3	HIF1A	0.0845764	Physical Interactions	IREF-innatedb
	EGLN3	EGLN2	0.243697	Physical Interactions	IREF-innatedb
	EGLN3	EGLN1	0.150433	Physical Interactions	IREF-innatedb
	CUL2	VHL	0.421338	Physical Interactions	IREF-mppi
	ELOC	VHL	0.289898	Physical Interactions	IREF-mppi
	ELOC	CUL2	0.421338	Physical Interactions	IREF-mppi
	ELOB	VHL	0.421338	Physical Interactions	IREF-mppi
	ELOB	ELOC	0.421338	Physical Interactions	IREF-mppi
	CUL2	VHL	0.0771575	Physical Interactions	Bennett-Harper-2010
	ELOC	CUL2	0.0175221	Physical Interactions	Bennett-Harper-2010
	ELOB	CUL2	0.0175221	Physical Interactions	Bennett-Harper-2010
	PDCD6	CUL2	0.0288042	Physical Interactions	Bennett-Harper-2010
	CUL2	VHL	0.0379857	Physical Interactions	Huttlin-Harper-2017
	ELOC	VHL	0.0534386	Physical Interactions	Huttlin-Harper-2017
	ELOB	VHL	0.12304	Physical Interactions	Huttlin-Harper-2017
	HIF1A	VHL	0.0421222	Physical Interactions	Huttlin-Harper-2017
	CUL2	VHL	0.134178	Physical Interactions	IREF-mint
	VEGFA	KDR	0.164772	Physical Interactions	IREF-mint
	ELOC	CUL2	0.0818915	Physical Interactions	IREF-mint
	ELOB	ELOC	0.220414	Physical Interactions	IREF-mint
	HIF1A	VHL	0.0521236	Physical Interactions	IREF-mint
	NRP1	KDR	0.120273	Physical Interactions	IREF-mint
	NRP1	VEGFA	0.656783	Physical Interactions	IREF-mint
	EGLN2	HIF1A	0.304186	Physical Interactions	IREF-mint
	EGLN1	HIF1A	0.172493	Physical Interactions	IREF-mint
	EGLN3	HIF1A	0.304186	Physical Interactions	IREF-mint
	RBX1	CUL2	0.117228	Physical Interactions	IREF-mint
	CDH5	KDR	0.0692585	Physical Interactions	IREF-mint
	NRP1	VEGFD	0.263321	Physical Interactions	IREF-corum
	NRP1	VEGFC	0.263321	Physical Interactions	IREF-corum
	ELOB	VHL	0.0575868	Physical Interactions	Ewing-Figeys-2007
	RBX1	VHL	0.106006	Physical Interactions	Ewing-Figeys-2007
	VEGFC	KDR	0.361476	Physical Interactions	IREF-bind-translation
	VEGFA	KDR	0.294428	Physical Interactions	IREF-bind-translation
	EPAS1	VHL	0.239833	Physical Interactions	IREF-bind-translation
	ELOC	VHL	0.194869	Physical Interactions	IREF-bind-translation
	ELOB	VHL	0.194869	Physical Interactions	IREF-bind-translation
	ELOB	ELOC	0.679623	Physical Interactions	IREF-bind-translation
	HIF1A	VHL	0.0582547	Physical Interactions	IREF-bind-translation
	JADE1	VHL	0.409421	Physical Interactions	IREF-bind-translation
	EGLN1	HIF1A	0.241579	Physical Interactions	IREF-bind-translation
	EGLN3	HIF1A	0.241579	Physical Interactions	IREF-bind-translation
	SH2D2A	KDR	0.470269	Physical Interactions	IREF-bind-translation
	VEGFC	KDR	0.866025	Physical Interactions	IREF-bind
	EPAS1	VHL	0.213717	Physical Interactions	IREF-bind
	ELOC	VHL	0.191267	Physical Interactions	IREF-bind
	ELOB	VHL	0.191267	Physical Interactions	IREF-bind
	ELOB	ELOC	0.679623	Physical Interactions	IREF-bind
	HIF1A	VHL	0.123067	Physical Interactions	IREF-bind
	JADE1	VHL	0.401852	Physical Interactions	IREF-bind
	ELOB	ELOC	0.5	Physical Interactions	Rual-Vidal-2005
	VEGFC	KDR	0.150738	Physical Interactions	IREF-matrixdb
	VEGFA	KDR	0.0290622	Physical Interactions	IREF-matrixdb
	GREM1	KDR	0.146824	Physical Interactions	IREF-matrixdb
	NRP1	KDR	0.0438703	Physical Interactions	IREF-matrixdb
	NRP1	VEGFA	0.0707832	Physical Interactions	IREF-matrixdb
	EGLN2	EPAS1	0.323748	Physical Interactions	IREF-matrixdb
	EGLN2	HIF1A	0.179624	Physical Interactions	IREF-matrixdb
	EGLN1	EPAS1	0.202004	Physical Interactions	IREF-matrixdb
	EGLN1	HIF1A	0.112077	Physical Interactions	IREF-matrixdb
	EGLN3	EPAS1	0.132865	Physical Interactions	IREF-matrixdb
	EGLN3	HIF1A	0.0737169	Physical Interactions	IREF-matrixdb
	CDH5	KDR	0.314098	Physical Interactions	IREF-matrixdb
	PDCD6	KDR	0.0651773	Physical Interactions	IREF-matrixdb
	JADE1	VHL	0.744377	Physical Interactions	Lim-Zoghbi-2006
	EGLN3	ELOC	0.0140654	Physical Interactions	Rodriguez-von Kriegsheim-2016
	EGLN3	ELOB	0.0140654	Physical Interactions	Rodriguez-von Kriegsheim-2016
	EGLN3	HIF1A	0.0140654	Physical Interactions	Rodriguez-von Kriegsheim-2016
	VEGFA	KDR	0.344082	Physical Interactions	IREF-spike
	EPAS1	VHL	0.0615867	Physical Interactions	IREF-spike
	ELOC	CUL2	0.0648107	Physical Interactions	IREF-spike
	ELOB	ELOC	0.141681	Physical Interactions	IREF-spike
	JADE1	VHL	0.31932	Physical Interactions	IREF-spike
	EGLN2	EPAS1	0.175389	Physical Interactions	IREF-spike
	EGLN2	HIF1A	0.131295	Physical Interactions	IREF-spike
	EGLN1	EPAS1	0.195458	Physical Interactions	IREF-spike
	EGLN1	HIF1A	0.146318	Physical Interactions	IREF-spike
	EGLN3	EPAS1	0.150681	Physical Interactions	IREF-spike
	RBX1	CUL2	0.120974	Physical Interactions	IREF-spike
	CDH5	KDR	0.193461	Physical Interactions	IREF-spike
	ELOB	ELOC	0.53499	Physical Interactions	IREF-huri
	RBX1	CUL2	0.616418	Physical Interactions	IREF-huri
	VEGFD	KDR	0.0563251	Physical Interactions	IREF-biogrid
	VEGFC	KDR	0.187775	Physical Interactions	IREF-biogrid
	VEGFA	KDR	0.0282597	Physical Interactions	IREF-biogrid
	EPAS1	VHL	0.00408667	Physical Interactions	IREF-biogrid
	ELOC	VHL	0.00251096	Physical Interactions	IREF-biogrid
	HIF1A	VHL	0.00157703	Physical Interactions	IREF-biogrid
	HIF1A	VHLL	0.0796552	Physical Interactions	IREF-biogrid
	HIF1A	VEGFA	0.00828783	Physical Interactions	IREF-biogrid
	HIF1A	EPAS1	0.0041419	Physical Interactions	IREF-biogrid
	HIF1A	ELOC	0.00254489	Physical Interactions	IREF-biogrid
	EGLN2	EPAS1	0.0272001	Physical Interactions	IREF-biogrid
	EGLN2	HIF1A	0.0104964	Physical Interactions	IREF-biogrid
	EGLN1	VHL	0.007844	Physical Interactions	IREF-biogrid
	EGLN1	EPAS1	0.0206014	Physical Interactions	IREF-biogrid
	EGLN1	HIF1A	0.00795001	Physical Interactions	IREF-biogrid
	EGLN3	EPAS1	0.00159955	Physical Interactions	IREF-biogrid
	EGLN3	ELOC	0.000982803	Physical Interactions	IREF-biogrid
	EGLN3	HIF1A	0.000617259	Physical Interactions	IREF-biogrid
	EGLN3	EGLN2	0.00405357	Physical Interactions	IREF-biogrid
	EGLN3	EGLN1	0.00307019	Physical Interactions	IREF-biogrid
	RBX1	VHL	0.00149687	Physical Interactions	IREF-biogrid
	RBX1	ELOC	0.00241554	Physical Interactions	IREF-biogrid
	RBX1	HIF1A	0.0015171	Physical Interactions	IREF-biogrid
	CDH5	KDR	0.0149142	Physical Interactions	IREF-biogrid
	VEGFC	VEGFD	0.796225	Predicted	Wu-Stein-2010
	HIF1A	EPAS1	0.0802113	Predicted	Wu-Stein-2010
	JADE1	VHL	0.0790618	Predicted	Wu-Stein-2010
	CUL2	VHL	0.362546	Predicted	I2D-IntAct-Mouse2Human
	ELOC	VHL	0.213864	Predicted	I2D-IntAct-Mouse2Human
	CUL2	VHL	0.567874	Predicted	I2D-INNATEDB-Mouse2Human
	ELOC	VHL	0.479061	Predicted	I2D-INNATEDB-Mouse2Human
	CDH5	EPAS1	0.603883	Predicted	I2D-INNATEDB-Mouse2Human
	EPAS1	VHL	0.776118	Predicted	I2D-BioGRID-Rat2Human
	HIF1A	VHL	0.254007	Predicted	I2D-BioGRID-Rat2Human
	HIF1A	CUL2	0.499284	Predicted	I2D-BioGRID-Rat2Human
	NRP1	VEGFA	1	Predicted	I2D-BioGRID-Rat2Human
	VEGFD	KDR	0.63931	Predicted	I2D-BioGRID-Mouse2Human
	VEGFA	KDR	0.360202	Predicted	I2D-BioGRID-Mouse2Human
	EPAS1	VHL	0.356881	Predicted	I2D-BioGRID-Mouse2Human
	ELOC	VHL	0.112448	Predicted	I2D-BioGRID-Mouse2Human
	HIF1A	VHL	0.104283	Predicted	I2D-BioGRID-Mouse2Human
	EGLN2	HIF1A	0.458744	Predicted	I2D-BioGRID-Mouse2Human
	EGLN1	HIF1A	0.458744	Predicted	I2D-BioGRID-Mouse2Human
	EGLN3	HIF1A	0.19033	Predicted	I2D-BioGRID-Mouse2Human
	RBX1	CUL2	0.137778	Predicted	I2D-BioGRID-Fly2Human
	EPAS1	VHL	0.524648	Predicted	I2D-BIND-Mouse2Human
	HIF1A	VHL	0.524648	Predicted	I2D-BIND-Mouse2Human
	VHLL	VHL	1	Shared protein domains	INTERPRO
	VEGFC	VEGFD	0.0552259	Shared protein domains	INTERPRO
	VEGFA	VEGFD	0.0540089	Shared protein domains	INTERPRO
	VEGFA	VEGFC	0.0552822	Shared protein domains	INTERPRO
	HIF1A	EPAS1	0.0276875	Shared protein domains	INTERPRO
	EGLN1	EGLN2	0.0451264	Shared protein domains	INTERPRO
	EGLN3	EGLN2	0.062854	Shared protein domains	INTERPRO
	EGLN3	EGLN1	0.0451264	Shared protein domains	INTERPRO
	VHLL	VHL	1	Shared protein domains	PFAM
	VEGFC	VEGFD	0.14711	Shared protein domains	PFAM
	VEGFA	VEGFD	0.14711	Shared protein domains	PFAM
	VEGFA	VEGFC	0.14711	Shared protein domains	PFAM
	HIF1A	EPAS1	0.155172	Shared protein domains	PFAM
	EGLN1	EGLN2	0.0455618	Shared protein domains	PFAM
	EGLN3	EGLN2	0.0775259	Shared protein domains	PFAM
	EGLN3	EGLN1	0.0455618	Shared protein domains	PFAM
